# Supplementary material for: Status, demand and practice models of palliative day-care clinics and day hospices: a scoping review
Source: HighWire-hosted journal article supplement (doi:10.1136/bmjspcare-2021-003171), 2021-07-26
Supplement: bmjspcare-2021-003171supp001_data_supplement.pdf [file bmjspcare-2021-003171supp001_data_supplement.pdf]

**SUPPLEMENTARY 1: LITERATURE SEARCH STRINGS****PubMed**

("palliative care"[tiab] OR "palliative care"[MeSH] OR "palliative treatment"[tiab] OR "palliative treatments"[tiab] OR "palliative therapy"[tiab] OR "palliative therapies"[tiab] OR "palliative supportive care"[tiab] OR "palliative care nursing"[tiab] OR "palliative medicine"[MeSH] OR "palliative medicine"[tiab] OR "hospice and palliative care nursing"[MeSH] OR "hospice and palliative care nursing"[tiab] OR "hospice care"[MeSH] OR "hospice care"[tiab] OR "hospice program"[tiab] OR "hospice programs"[tiab] OR "hospice programme"[tiab] OR "hospice programmes"[tiab] OR "hospice nursing"[tiab] OR hospices[MeSH] OR hospice[tiab] OR hospices[tiab] OR "terminal care"[MeSH] OR "terminal care"[tiab] OR dying[tiab] OR cancer[tiab] OR palliative[tiab] OR "terminally ill"[tiab] OR "terminal illness"[tiab] OR "terminal disease"[tiab] OR "terminal diseases"[tiab] OR "end of life care"[tiab] OR "end of life"[tiab] OR eol[tiab] OR "life's end"[tiab] OR "advance care planning"[MeSH] OR "advance care planning"[tiab] OR "advance medical planning"[tiab] OR "advanced illness"[tiab] OR "advanced illnesses"[tiab] OR "advanced disease"[tiab] OR "advanced diseases"[tiab] OR "end-stage illness"[tiab] OR "end-stage illnesses"[tiab] OR "end-stage disease"[tiab] OR "end-stage diseases"[tiab] OR "chronic disease"[MeSH] OR "chronic disease"[tiab] OR "chronic diseases"[tiab] OR "chronic illness"[tiab] OR "chronic illnesses"[tiab] OR "multiple chronic illnesses"[tiab] OR "multiple chronic medical conditions"[tiab] OR "chronic medical condition"[tiab] OR "chronic medical conditions"[tiab] OR "multiple chronic conditions"[MeSH] OR "multiple chronic conditions"[tiab] OR "palliative care services"[tiab] OR "palliative care center"[tiab] OR "palliative care centers"[tiab] OR "palliative care centre"[tiab] OR "palliative care centres"[tiab] OR "life support care"[MeSH] OR "life support care" [tiab] OR "chronically ill" [tiab]) AND ("day care"[tiab] OR daycare[tiab] OR "day hospital"[tiab] OR "day hospice"[tiab] OR "partial hospitalization"[MeSH] OR "partial hospitalization"[tiab] OR "partial hospitalisation"[tiab] OR "day service"[tiab] OR "day services"[tiab] OR "day clinic"[tiab] OR "day clinics"[tiab] OR "day care, medical"[MeSH] OR "day care, medical"[tiab] OR "daycare, medical"[tiab] OR "medical day care"[tiab] OR "medical daycare"[tiab] OR "adult day care centre"[tiab] OR "adult day care center"[tiab] OR "adult day care centers"[MeSH] OR "adult day care centres"[tiab] OR "adult day care centers"[tiab]) OR ("palliative day care services"[tiab] OR "palliative daycare services"[tiab] OR "palliative day care"[tiab] OR "palliative daycare"[tiab]

OR "adult hospice day care"[tiab] OR "adult hospice daycare"[tiab] OR "hospice day care"[tiab] OR "hospice daycare"[tiab] OR "day hospice care"[tiab] OR "specialist palliative day care"[tiab] OR "specialist palliative daycare"[tiab]) NOT (infant[tiab] OR infants[tiab] OR baby[tiab] OR babies[tiab] OR newborn[tiab] OR newborns[tiab] OR "minor child"[tiab] OR "minor children"[tiab] OR "dependent child"[tiab] OR "dependent children"[tiab] OR pediatric[tiab] OR pediatrics[tiab] OR paediatric[tiab] OR paediatrics[tiab] OR neonatal[tiab] OR perinatal[tiab] OR fetal[tiab] OR foetal[tiab] OR childhood[tiab] OR euthanasia[tiab] OR "assisted suicide"[tiab] OR "violent death" [tiab]))

### Web of Science

(TS=("palliative care" OR "palliative treatment\$" OR "palliative therapy" OR "palliative therapies" OR "palliative supportive care" OR "palliative care nursing" OR "palliative medicine" OR "hospice and palliative care nursing" OR "hospice care" OR "hospice program\*" OR "hospice nursing" OR "hospice\$" OR "terminal care" OR dying OR cancer OR palliative OR "terminally ill" OR "terminal illness" OR "terminal disease\$" OR "end of life care" OR "end of life" OR eol OR "life's end" OR "advance care planning" OR "advance medical planning" OR "advanced illness\*" OR "advanced disease\$" OR "end-stage illness\*" OR "end-stage disease\$" OR "chronic disease\$" OR "chronic illness\*" OR "multiple chronic illnesses" OR "multiple chronic medical conditions" OR "chronic medical condition\$" OR "palliative care services" OR "palliative care center\$" OR "palliative care centre\$" OR "life support care" OR "chronically ill") AND TS=("day care" OR "daycare" OR "day hospital" OR "day hospice" OR "partial hospitalization" OR "partial hospitalisation" OR "day service\$" OR "day clinic\$" OR "daycare, medical" OR "day care, medical" OR "medical day care" OR "medical daycare" OR "adult day care centre\$" OR "adult day care center\$") OR TS=("palliative day care services" OR "palliative daycare services" OR "palliative day care" OR "palliative daycare" OR "adult hospice day care" OR "adult hospice daycare" OR "adult hospice day care" OR "hospice day care" OR "hospice daycare" OR "day hospice care" OR "specialist palliative day care" OR "specialist palliative daycare") NOT TS=("infant\$" OR baby OR babies OR "newborn\$" OR "minor child\*" OR "dependent child\*" OR "pediatric\$" OR "paediatric\$" OR neonatal OR perinatal OR fetal OR foetal OR childhood OR euthanasia OR "assisted suicide" OR "violent death"))

**CINAHL**

((MW "palliative care" OR TI "palliative care" OR AB "palliative care" OR TI "palliative treatment\*" OR AB "palliative treatment\*" OR TI "palliative therap\*" OR AB "palliative therap\*" OR TI "palliative supportive care" OR AB "palliative support care" OR TI "palliative care nursing" OR AB "palliative care nursing" OR TI "palliative medicine" OR AB "palliative medicine" OR TI "hospice and palliative care nursing" OR AB "hospice and palliative care nursing" OR MW "hospice care" OR TI "hospice care" OR AB "hospice care" OR TI "hospice program\*" OR AB "hospice program\*" OR TI "hospice programme\*" OR AB "hospice programme\*" OR TI "hospice nursing" OR AB "hospice nursing" OR TI hospice\* OR AB hospice\* OR TI "terminal care" OR AB "terminal care" OR TI dying OR AB dying OR TI cancer OR AB cancer OR TI palliative OR AB palliative OR TI "terminally ill" OR AB "terminally ill" OR TI "terminal illness\*" OR AB "terminal illness\*" OR TI "terminal disease\*" OR AB "terminal disease\*" OR TI "end of life care" OR AB "end of life care" OR TI "end of life" OR AB "end of life" OR TI eol OR AB eol OR TI "life's end" OR AB "life's end" OR TI "advance care planning" OR AB "advance care planning" OR TI "advance medical planning" OR AB "advance medical planning" OR TI "advanced illness\*" OR AB "advanced illness\*" OR TI "advanced disease\*" OR AB "advanced disease\*" OR TI "end-stage illness\*" OR AB "end-stage illness\*" OR TI "end-stage disease\*" OR AB "end-stage disease\*" OR TI "chronic disease\*" OR AB "chronic disease\*" OR TI "chronic illness\*" OR AB "chronic illness\*" OR TI "multiple chronic illnesses" OR AB "multiple chronic illnesses" OR TI "multiple chronic medical conditions" OR AB "multiple chronic medical conditions" OR TI "chronic medical condition\*" OR AB "chronic medical condition\*" OR TI "multiple chronic conditions" OR AB "multiple chronic conditions" OR TI "palliative care services" OR AB "palliative care services" OR TI "palliative care center\*" OR AB "palliative care center\*" OR TI "palliative care centre\*" OR AB "palliative care centre\*" OR TI "life support care" OR AB "life support care" OR TI "chronically ill" OR AB "chronically ill") AND (MW "day care" OR TI "day care" OR AB "day care" OR MW daycare OR TI daycare OR AB daycare OR TI "day hospital" OR AB "day hospital" OR TI "day hospice" OR AB "day hospice" OR TI "partial hospitalization" OR AB "partial hospitalization" OR TI "partial hospitalisation" OR AB "partial hospitalisation" OR TI "day service\*" OR AB "day service\*" OR TI "day clinic\*" OR AB "day clinic\*" OR TI "day care, medical" OR AB "day care, medical" OR TI "daycare, medical" OR AB "daycare, medical" OR TI "medical day care" OR AB "medical day care" OR TI "medical daycare" OR AB "medical daycare" OR TI "adult day

care centre\*" OR AB "adult day care centre\*" OR TI "adult day care center\*" OR AB "adult day care center\*") OR (TI "palliative day care services" OR AB "palliative day care services" OR TI "palliative daycare services" OR AB "palliative daycare services" OR MW "palliative day care" OR TI "palliative day care" OR AB "palliative day care" OR MW "palliative daycare" TI "palliative daycare" OR AB "palliative daycare" OR TI "adult hospice day care" OR AB "adult hospice day care" OR TI "adult hospice daycare" OR AB "adult hospice daycare" OR MW "hospice day care" OR TI "hospice day care" OR AB "hospice day care" OR MW "hospice daycare" OR TI "hospice daycare" OR AB "hospice daycare" OR TI "day hospice care" OR AB "day hospice care" OR TI "specialist palliative day care" OR AB "specialist palliative day care" OR TI "specialist palliative daycare" OR AB "specialist palliative daycare") NOT (TI "infant\*" OR AB "infant\*" OR TI baby OR AB baby OR TI babies OR AB babies OR TI newborn\* OR AB newborn\* OR TI "minor child\*" OR AB "minor child\*" OR TI "dependent child\*" OR AB "dependent child\*" OR TI pediatric\* OR AB pediatric\* OR TI paediatric\* OR AB paediatric\* OR TI neonatal OR AB neonatal OR TI perinatal OR AB perinatal OR TI fetal OR AB fetal OR TI foetal OR AB foetal OR TI childhood OR AB childhood OR TI euthanasia OR AB euthanasia OR TI "assisted suicide" OR AB "assisted suicide" OR TI "violent death" OR AB "violent death"))

### GoogleScholar

(("palliative care" OR hospice OR "hospice care" OR "terminal care") AND (daycare OR "day care" OR "day service" OR "day hospital" OR "day clinic") OR ("palliative day care services" OR "adult hospice daycare" OR "specialist palliative daycare"))
